# Supplementary material for: A modular transcriptional signature identifies phenotypic heterogeneity of human tuberculosis infection
Source: PubMed Central journal article supplement (PMC6008327; doi:10.1038/s41467-018-04579-w), 2018-06-19
Supplement: 41467_2018_4579_MOESM2_ESM.pdf [file 41467_2018_4579_MOESM2_ESM.pdf]

## **Description of Additional Supplementary Files**

File Name: **Supplementary Data 1**

Description: The whole-blood 373-gene transcriptional signature of TB derived from RNA-seq Berry London cohort.

File Name: **Supplementary Data 2**

Description: List of co-expressed genes in the 23 modules derived using WGCNA from combined Berry London & South Africa cohorts.

File Name: **Supplementary Data 3**

Description: List of the 70 genes consistently upregulated in active TB (without outliers) and LTBI outliers from Berry Combined and Leicester datasets, compared to respective controls.
